# Supplementary material
Source: Springer Nature journal article supplement (https://www.springermedizin.de/resource/supplementary/13051_2010_102_MOESM23_ESM.pdf/9670010)

## Survival Function at mean of covariates

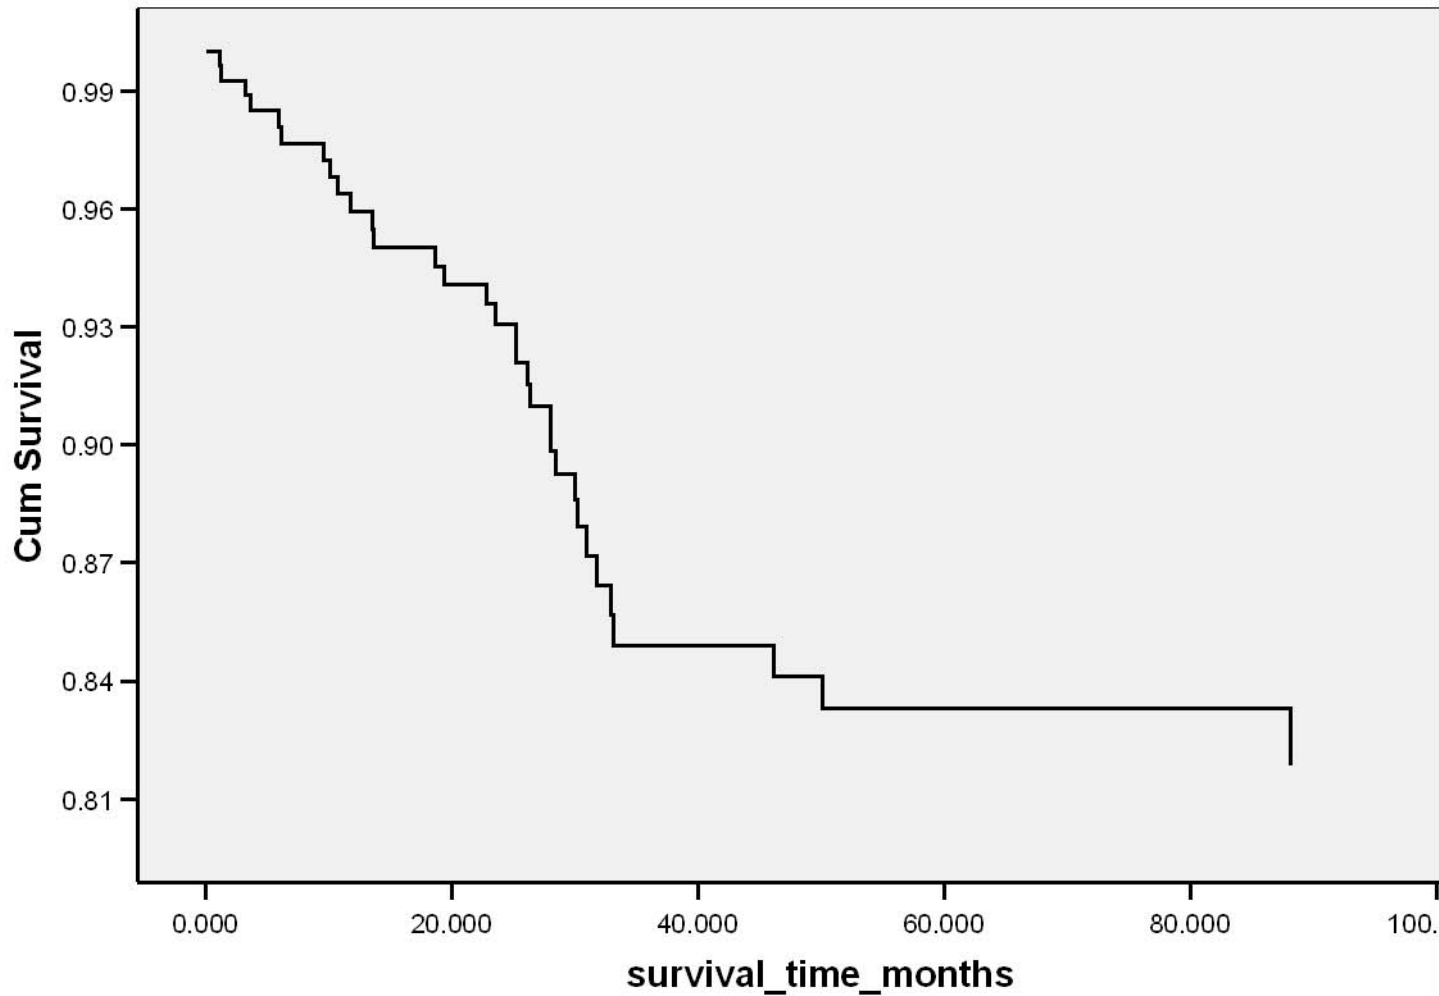

Supplement: MOESM23 [file 9670010]
